# Supplementary material
Source: PubMed Central journal article supplement (PMC2435241)
Supplement: NIHMS1637-supplement-01.pdf [file NIHMS1637-supplement-01.pdf]

# Fig. S1

## Reis et al.

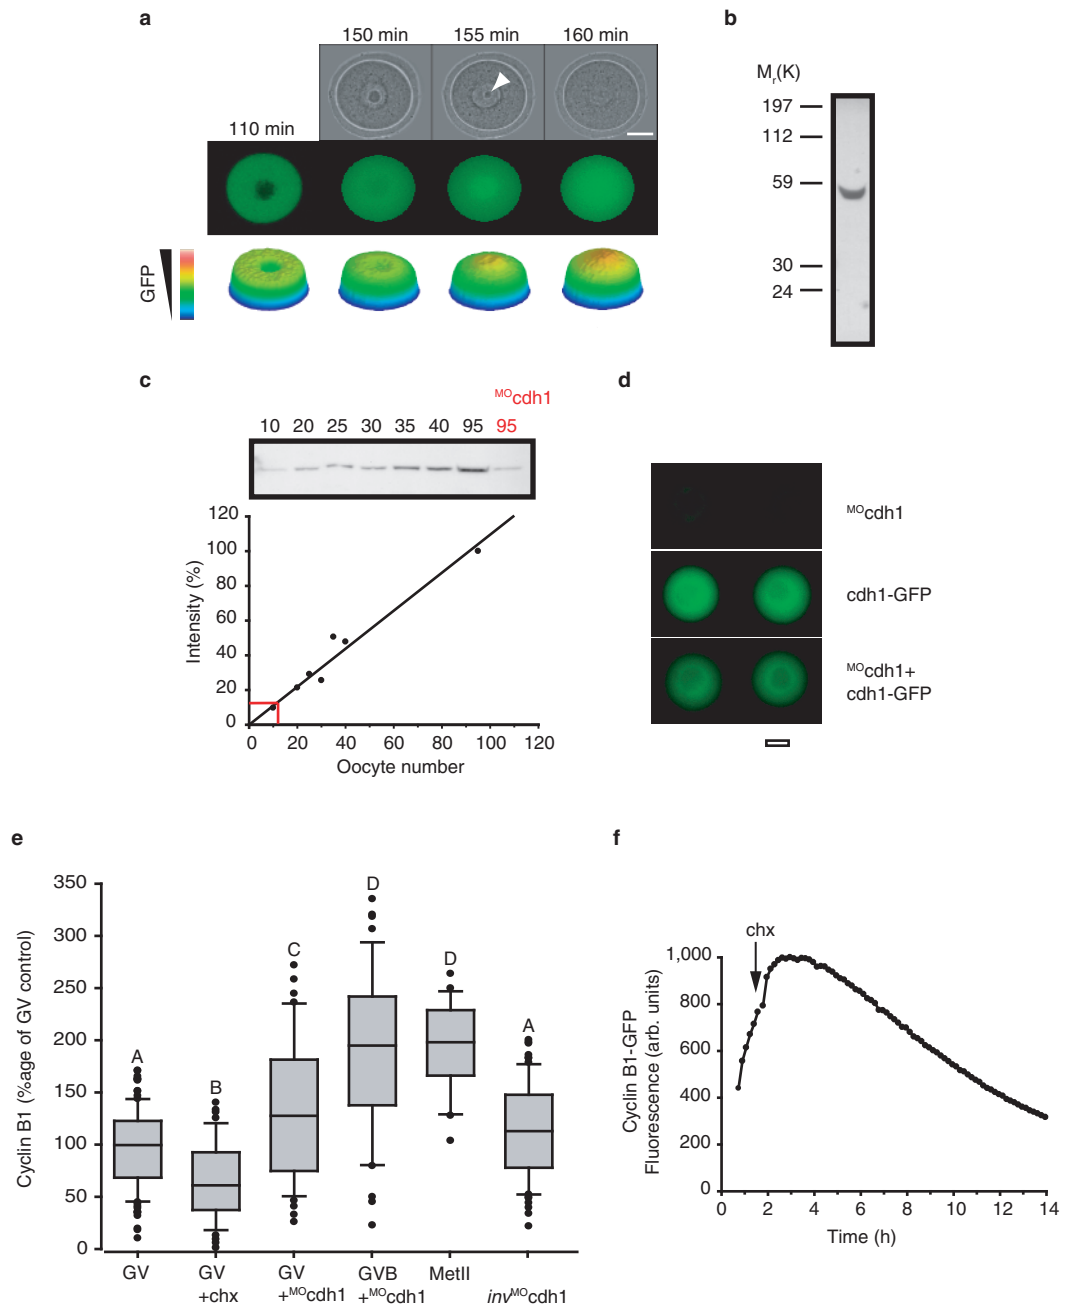

**Figure S1.** (a) GVB induced by injection of cyclin B1-GFP (at  $t=0$  min) observed by brightfield (top row); and corresponding cyclin B1-GFP fluorescence by confocal (110 min; middle row) or epifluorescence (150-160 min; middle row) and their corresponding topographical representations (bottom row) at the times indicated. GVB ends with the disappearance of the nucleolus (arrowhead). Media contained  $1\mu\text{M}$  milrinone. Bar is  $20\mu\text{m}$ . (b) Western blot of *cdh1* in 75 GV arrested oocytes using a monoclonal antibody to *cdh1* (ab3242, Abcam). Molecular weight markers are indicated. The same molecular weight band was obtained using a second *cdh1* monoclonal AR38 (not shown). (c) Western blot for *cdh1* in increasing numbers of GV arrested oocytes (between 10 and 95) and oocytes microinjected with *cdh1* morpholino ( $n=95$ ) and then cultured for 24 h. Densitometric analysis of bands (100% intensity corresponding to 95 control oocytes) versus oocyte number, with the red lines indicating the densitometric value for morpholino-treated oocytes. The morpholino reduced *cdh1* levels by about 90%. A further blot of just 75 control and  $\text{MO}^{\text{cdh1}}$ -injected oocytes confirmed the effectiveness of the knockdown. (d) Fluorescence images of oocytes injected with  $\text{MO}^{\text{cdh1}}$ , *cdh1*-GFP, or  $\text{MO}^{\text{cdh1}}$  + *cdh1*-GFP. The morpholino to *cdh1* was not able to block expression of exogenously added *cdh1* cRNA, demonstrating that *cdh1* cRNA rescue following endogenous gene knockdown is possible. Scale bar is  $50\mu\text{m}$ . (e) Endogenous cyclin B1 measured by immunofluorescence in fixed and permeabilised oocytes. GV oocytes were cultured for 14 h in milrinone-containing medium alone (GV;  $n=143$ ); with cycloheximide (GV+chx;  $n=49$ ); with injection of  $\text{MO}^{\text{cdh1}}$  ( $n=91$ ); with injection of *inv* $\text{MO}^{\text{cdh1}}$  ( $n=79$ ); or without milrinone (MetII;  $n=23$ ). Oocytes injected with  $\text{MO}^{\text{cdh1}}$  were grouped into those still GV arrested (GV +  $\text{MO}^{\text{cdh1}}$ ;  $n=48$ ) or those having undergone GVB (GVB +  $\text{MO}^{\text{cdh1}}$ ;  $n=43$ ). Oocytes cultured without milrinone had matured, extruded a first polar body and so were classified as at metaphase II. Immunofluorescence levels were normalised with respect to GV controls. Data is presented in Box and Whisker format: the 25th and 75th percentile form the box with the mean marked as a line, the 10th and 80th percentile form the whiskers and the outlying points are plotted individually. Different letters denotes significantly different ( $p=0.05$ ; 1-way ANOVA with Fisher's post-hoc test). (f) Representative degradation profile of cyclin B1-GFP in a GV oocyte following the translation of cyclin B1-GFP cRNA and the addition of cycloheximide (chx) to block further synthesis. The oocyte had been microinjected 24 h previously with *inv* $\text{MO}^{\text{cdh1}}$ , a control morpholino for *cdh1*, to act as a sham-knockdown for *cdh1*.

## Supplementary Information

**Table S1.** Percent loss in GFP signal for various cRNA constructs

| cRNA injection                                     | cdh1 rescue? | Percent loss in fluorescence <sup>a</sup><br>mean±sd (n) |
|----------------------------------------------------|--------------|----------------------------------------------------------|
| GFP                                                | NA           | 0± 4 (16)                                                |
| Cyclin B1-GFP                                      | NA           | 72±13 (13)                                               |
| Cyclin B1-GFP<br>+ <sup>MO</sup> cdh1              | -<br>+       | 6± 3 (14)<br>79± 5 (12) <sup>c</sup>                     |
| Cyclin B1-GFP<br>+ <i>inv</i> <sup>MO</sup> cdh1   | NA           | 69± 9 (16)                                               |
| Cdc20-GFP                                          | NA           | 54±15 (18)                                               |
| Cdc20-GFP<br>+MG132                                | NA           | 22±12 (15) <sup>b</sup>                                  |
| Cdc20-GFP<br>+MeUb                                 | NA           | 23±11 (17) <sup>b</sup>                                  |
| Cdc20-GFP<br>+ <sup>MO</sup> cdh1                  | -<br>+       | 9± 3 (15)<br>70± 9 (18) <sup>c</sup>                     |
| Securin <sup>dm</sup> -GFP                         | NA           | 70±18 (11)                                               |
| Securin <sup>dm</sup> -GFP<br>+ <sup>MO</sup> cdh1 | -<br>+       | 7± 4 (16)<br>76±10 (15) <sup>c</sup>                     |

<sup>a</sup> Following cycloheximide addition or cdh1 cRNA microinjection. Cdh1 cRNA was microinjected in rescue experiments only (+); for all others degradation rates following addition of cycloheximide are given. The relative fall in GFP fluorescence was calculated 14 h later.

<sup>b</sup> Statistically different from Cdc20-GFP alone (Chi-Squared,  $p < 0.05$ ).

<sup>c</sup> Statistically different from non-rescue (Chi-Squared,  $p < 0.01$ ).

NA, not applicable. Rescue experiments were performed following <sup>MO</sup>cdh1 addition only.

## **Supplementary Information.**

### **METHODS**

All chemicals were from Sigma-Aldrich and the UK unless stated otherwise

#### **Oocyte collection and culture**

GV oocytes were collected from four to six week old MFI mice (Harlan) mice 44-52 h after intraperitoneal injection of 7.5 IU pregnant mares' serum gonadotrophin (Calbiochem). For bench handling, microinjections, and imaging experiments oocytes, were cultured in medium M2. For long-term incubation, GV stage oocytes were cultured in MEM (Gibco) with 20% foetal calf serum in a 5% CO<sub>2</sub> humidified incubator at 37°C. Milrinone (1µM) was used to arrest GV oocytes when necessary.

#### **cRNA and morpholinos**

Cyclin B1, Δ90 cyclin B1, securin<sup>dm</sup> and cdc20 were made as described previously<sup>6,7</sup>, using a modified pRN3 vector designed to produce protein C-terminally coupled to MmGFP<sup>11</sup>. cRNA was synthesised using T3 mMACHINE (Ambion), and dissolved in nuclease-free water to a concentration of approximately 1 µg/µl before microinjection.

The following morpholinos (Gene Tools LLC, OR, USA) were used at a micropipette concentration of 1.5mM: <sup>MO</sup>cdh1, 5'-CCTTCGCTCATAGTCCTGGTCCATG-3'; and *inv*<sup>MO</sup>cdh1, 5'-GTACCTGGTCCCTGATACTCGCTTCC-3'.

#### **Microinjections and imaging**

All microinjections into oocytes were made on the heated stage of a Nikon TE300 inverted microscope as described previously<sup>7</sup>. Briefly, micropipettes were inserted into cells using the negative capacitance overcompensation facility on an electrophysiological amplifier. This procedure ensures a very high rate of cell survival. A single 0.1-0.3% volume injection was achieved using a timed injection on

a Pneumatic PicoPump (World Precision Instruments). Brightfield and GFP images were recorded by epi-fluorescence and a Sony Interline MicroMax CCD camera. Confocal sections were performed on a LeicaSP2. Metamorph and Metafluor software (Universal Imaging Corp., PA, USA) were used for image capture and data analysis.

### **Westerns**

Oocytes were washed in phosphate-buffered saline with 1% polyvinylpyrrolidone (PBS+PVP), and heated at 95°C for 5 mins with 5x sample buffer (0.06M TRIS-HCl, pH 6.8, 2%SDS, 10% glycerol 0.025% bromophenol blue and 5% mercaptoethanol). Proteins were separated on a XCell Blot Module (Invitrogen) using a 10% NuPage Bis-Tris precast gel (Invitrogen) and a MOPS running buffer. Proteins were blotted onto polyvinylidenedifluoride membranes. Anti-cdh1 ab3242 (Abcam, UK) was used for Western Blotting at 1:200. We confirmed the presence of cdh1 in GV oocytes using a second cdh1 antibody (AR38; gift of Drs J Gannon and T Hunt, CRUK). Standard ECL techniques (Amersham) were used for detection according to manufacturer's instructions.

### **Immunofluorescence**

Oocytes were fixed with 3.7% paraformaldehyde in PBS+PVP and then transferred to the same containing 2% Triton-X100. Fixing and permeabilising were for 30 mins at room temperature. Oocytes were then washed extensively before incubation with 1:400 anti-cyclin B1 (ab72; Abcam). Following further washes oocytes were incubated with 1:20 TRITC labelled rabbit ant-mouse IgG (Dako). These incubations were at 37°C in PBS+PVP. Whole cell epi-fluorescence was used to measure cyclin B1 levels using Metamorph software.

### **Statistical analysis**

All 1-way ANOVA statistical analysis was performed using Minitab release 14, with a 95% confidence level and Fisher's post-hoc analysis. Yates' correction was used for Chi-squared analysis.
